# Supplementary material
Source: PubMed Central journal article supplement (PMC3925349)
Supplement: NIHMS546602-supplement-1_si_001.pdf [file NIHMS546602-supplement-1_si_001.pdf]

# Supporting Information

## Immobilization of antimicrobial peptide IG-25 onto fluoropolymers via fluororous interactions and click chemistry

*Catherine M. Santos,<sup>†</sup> Amit Kumar,<sup>†</sup> Satya S. Kolar,<sup>‡</sup> Rafael Contreras-Caceres,<sup>†</sup> Alison McDermott<sup>‡</sup> and Chengzhi Cai<sup>\*†</sup>*

<sup>†</sup>Department of Chemistry, University of Houston, Houston, Texas 77204 , USA. E-mail: cai@uh.edu

<sup>‡</sup>College of Optometry, University of Houston, Houston, Texas 77204, USA

## Synthesis.

Compounds **1** and **3** were synthesized according to our published method.<sup>[1]</sup>

*18,18,19,19,20,20,21,21,22,22,23,23,24,24,25,25,25-heptafluoro-17-oxo-4,7,10,13-tetraoxa-16-azapentacosan-1-oic acid (2)*

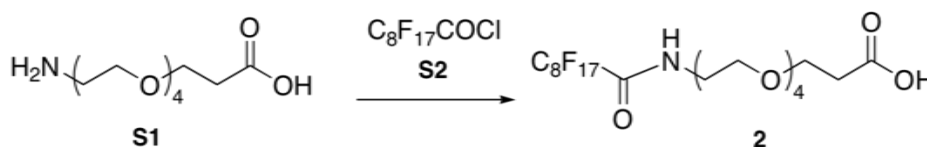

A solution of  $\text{C}_8\text{F}_{17}\text{COCl}$  (**S2**, 385 mg, 0.80 mmol) in dry THF (0.5 mL) was dropwise added to a solution of the amine **S1** (200 mg, 0.75 mmol) and triethylamine (0.14 mL, 1.0 mmol) in dry THF (1 mL) at 0 °C under nitrogen. After being stirred for 1.5 h at 0 °C, the reaction mixture was stirred overnight at room temperature. Saturated aqueous  $\text{NH}_4\text{Cl}$  (5 mL) was added, and the mixture was extracted three times with  $\text{Et}_2\text{O}$ . The combined organic layers were washed with water, brine, and dried over  $\text{Na}_2\text{SO}_4$ . Flash chromatography ( $\text{EtOAc}:\text{MeOH}$  10:1) gave the acid **2** (320 mg, 0.45 mmol, 60%) as a yellow oil.  $^1\text{H}$  NMR (300 MHz,  $\text{CD}_3\text{OH}$ ,  $\delta$  3.71-3.34 (m, 14H), 2.58 (t,  $J = 4.5$  Hz, 2H);  $^{13}\text{C}$  NMR (75 MHz,  $\text{CD}_3\text{OH}$ ):  $\delta$  77, 164.1, 108.4-125.5, 71.9, 71.8, 71.2, 68.4, 41.5, 36.0. MS (ESI)  $m/z$  calcd for  $\text{C}_{20}\text{H}_{22}\text{F}_{17}\text{NO}_7$ : 711.3; found: 734.4 ( $[\text{M} + \text{Na}]^+$ ).

**XPS measurements.** A PHI 5700 X-ray photoelectron spectrometer was equipped with a monochromatic Al  $\text{K}\alpha$  X-ray source ( $h\nu=1486.7$  eV) incident at 90° relative to the axis of a hemispherical energy analyzer. The spectrometer was operated both at high and low resolutions with pass energies of 23.5 eV and 187.85 eV, a photoelectron take off angle of 45° from the surface, and an analyzer spot diameter of 1.1 mm. The survey spectra were collected from 0 to 1400 eV, and the high-resolution spectrum was obtained for photoelectrons emitted from C1s,

O1s, Si 2p, N1s, and F1s. All spectra were collected at room temperature with a base pressure of  $1 \times 10^{-8}$  torr. Electron binding energies were calibrated with respect to the alkyl C1s line at 284.5 eV. A PHI Multipak software (version 5.0A) was used for all data processing. The high-resolution data were analyzed first by background subtraction using the Shirley routine and a subsequent non-linear fitting to mixed Gaussian-Lorentzian functions. Atomic compositions were derived from the high-resolution scans. Peak areas were obtained after subtraction of the integrated baseline and corrected for sensitivity factors.

**Estimate of surface density of IG-25 ( $\rho_p$ ).** Ignoring the attenuation of C1s and N1s signals, the density of IG-25 ( $\rho_p$ ) on the film **B** or **E** can be estimated from XPS measurement using the equation [1] and is summarized in table S1.

$$C/N = \frac{a + (\rho_p / \rho_f)m}{b + (\rho_p / \rho_f)n} \quad [1]$$

where the C/N atomic ratio is measured by XPS using C1s peak position within 284–288 eV (excluding the signal from CF<sub>2</sub> at 290 eV) and N1s at ~400 eV, contributed from the alkyne **1** or carboxylic acid **2**, represented as C<sub>a</sub>N<sub>b</sub>, *a* and *b* being the number of C atoms (other than CF<sub>2</sub>) and N atoms, on the precursor films, and the peptide **N<sub>3</sub>-EG<sub>12</sub>-IG-25** on the film **B** or **IG-25** on the film **E**, represented as C<sub>m</sub>N<sub>n</sub>, *m* and *n* being the number of C atoms and N atoms, and  $\rho_p / \rho_f$  is the density ratio of the peptide over the fluoruous chains **1** or **2**. Thus, for the film **B**: *a* = 11, *b* = 1, *m* = 137 + 27 = 164, *n* = 42 + 3 = 45, and for the film **E**: *a* = 9, *b* = 1, *m* = 137, *n* = 42. The density ( $\rho_f$ ) of the fluoruous chains **1** or **2** is estimated by the following formula:<sup>[2,3]</sup>

$$\rho_f = \frac{\rho_d N_a}{M_w} \quad [2]$$

where  $\rho$  is the density of **1** or **2** on film **A** or **C**, assuming to be 1 gm/cm<sup>3</sup>,  $N_A$  is the Avogadro's number,  $M_w$  is the molecular weight of **1** (677 gm/mol) or **2** (726 gm/mol), and  $d$  is the thickness of **1** or **2** on the film **A** or **C**, estimated to be 22.8 Å for film **A** and 23.0 Å for film **C** based on the angle-resolved XPS data shown in Tables S2 and S3 and Figure S1, using the method described in the literature.<sup>[4]</sup> Table S1 shows data for the estimation of the surface density.

**Table S1.** Data for estimation of the density of proteins deposited from solutions of various concentration on surface B (20mg/mL) and surface E (200 mg/mL and 20 mg/mL). The data are expressed in molecules of IG-25/nm<sup>2</sup> and are calculated using equation [1].

| Analyzed surface       | (C/N) ratio | (a b)  | (m n)    | * $\rho_f$<br>(molecules/nm <sup>2</sup> ) | $\rho_p$<br>(molecules/nm <sup>2</sup> ) |
|------------------------|-------------|--------|----------|--------------------------------------------|------------------------------------------|
| Surface B              | 5.5         | (11 1) | (164 45) | 2.0 x 10 <sup>14</sup>                     | 1.4 x 10 <sup>13</sup>                   |
| Surface E<br>(200mg/L) | 3.3         | (9 1)  | (137 45) | 1.9 x 10 <sup>14</sup>                     | 1.2 x 10 <sup>13</sup>                   |
| Surface E<br>(20mg/L)  | 3.5         | (9 1)  | (137 45) | 1.9 x 10 <sup>14</sup>                     | 5.2 x 10 <sup>13</sup>                   |

\* Calculated using equation [2].

**Table S2.** Data of C 1s Signals Intensities of the COOH-modified ( $I_{C1s}^{\text{COOH-modified}}$ ) and the Unmodified ( $I_{C1s}^{\text{unmodified}}$ ) Fluorous Substrates at Different Take-off Angles ( $\theta$ )

| $\theta$ | $1/\sin \theta$ | $I_{C1s}^{\text{COOH-modified}}$ | $I_{C1s}^{\text{unmodified}}$ | $-\ln A$ |
|----------|-----------------|----------------------------------|-------------------------------|----------|
| 30       | 2.00            | 20                               | 93                            | 1.54     |
| 40       | 1.41            | 30                               | 96                            | 1.16     |
| 60       | 1.16            | 35                               | 98                            | 1.03     |
| 75       | 1.04            | 37                               | 99                            | 0.98     |

**Table S3.** Data of C 1s Signals Intensities of the Alkynyl-modified ( $I_{C1s}^{\text{Alkyne-modified}}$ ) and the Unmodified ( $I_{C1s}^{\text{unmodified}}$ ) Fluorous Substrates at Different Take-off Angles ( $\theta$ )

| $\theta$ | $1/\sin \theta$ | $S_{C1s}^{\text{alkyne-modified}}$ | $S_{C1s}^{\text{unmodified}}$ | $-\ln A$ |
|----------|-----------------|------------------------------------|-------------------------------|----------|
| 30       | 2.00            | 21                                 | 93                            | 1.49     |
| 40       | 1.41            | 32                                 | 96                            | 1.10     |
| 60       | 1.16            | 34                                 | 98                            | 1.06     |
| 75       | 1.04            | 37                                 | 99                            | 0.98     |

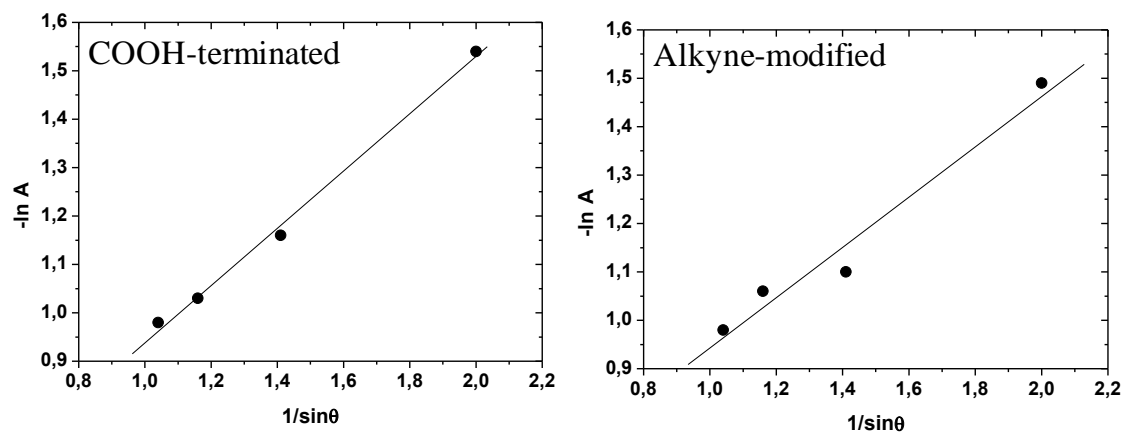

**Figure S1.** Plot of  $-\ln A$  as a function of  $1/\sin\theta$  for the COOH-terminated and for the alkyne-modified fluorosurfaces **C** and **A**, respectively.

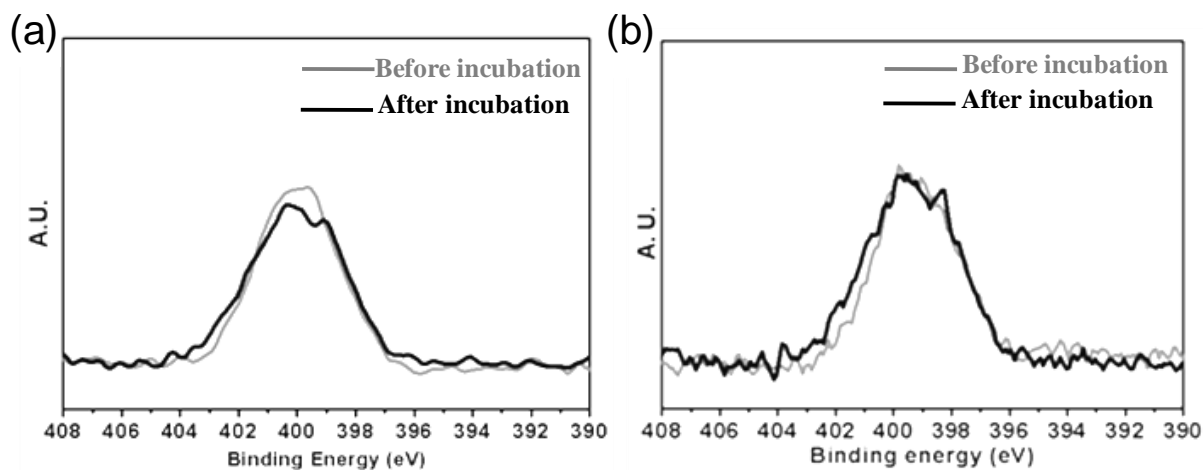

**Figure S2.** XPS N 1s spectra of the IG-25-presenting surfaces prepared by (a) the carbodiimide- and (b) the click-modified IG-25 fluorosurfaces **E** and **B** before and after incubation in PBS for 24 h.

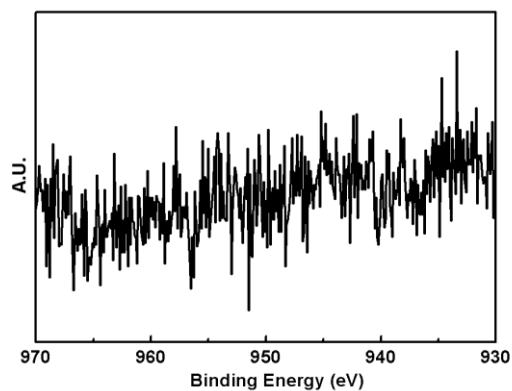

**Figure S3.** XPS Cu 2p spectra of the IG-25-modified contact lens after click functionalization.

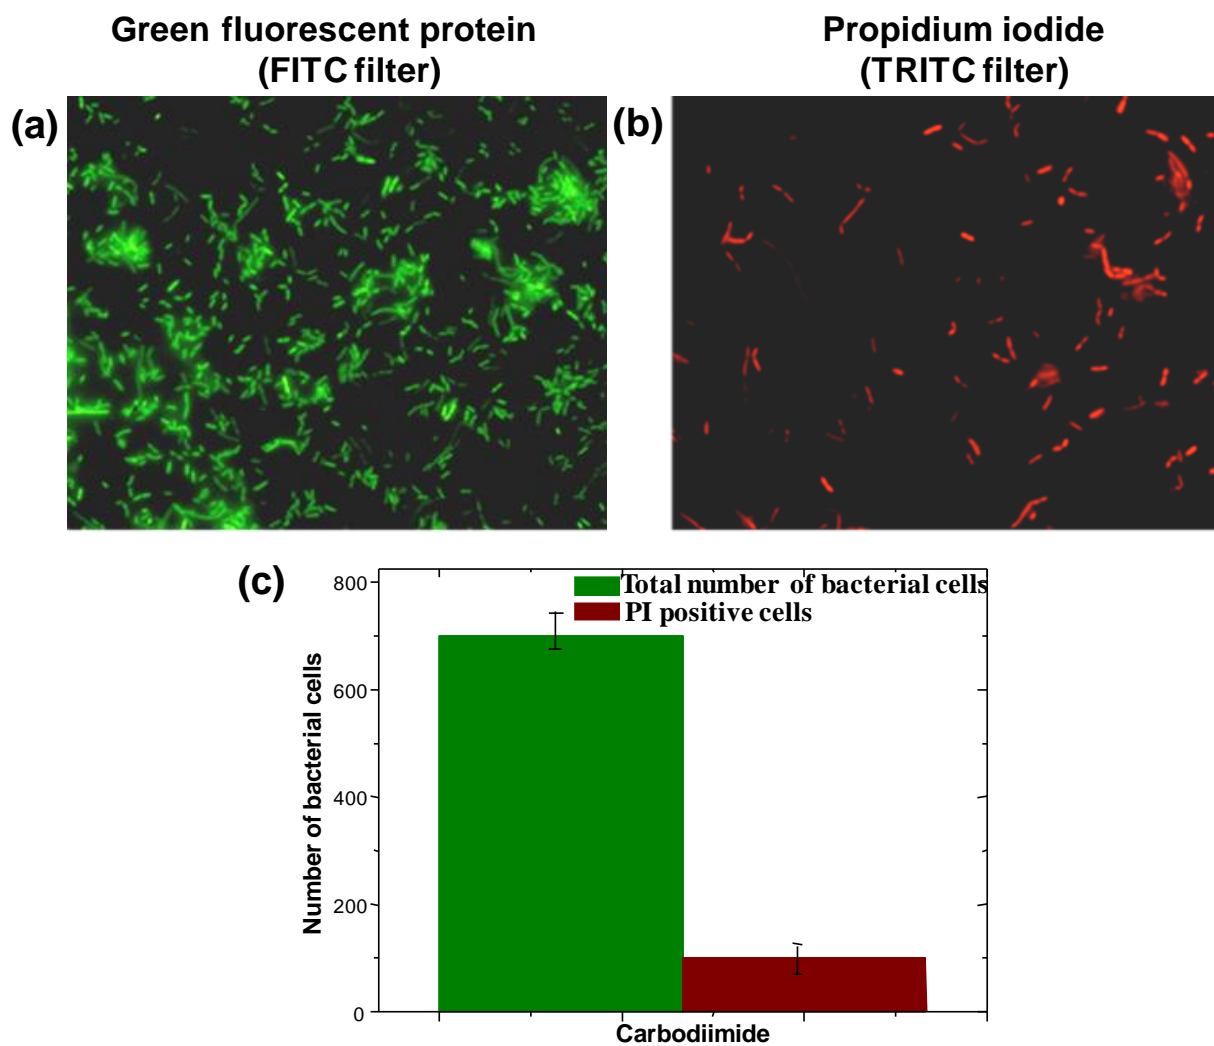

**Figure S4.** Fluorescence images (a) and (b) (Area:  $149 \times 112 \mu\text{m}^2$ ) of the GFP-transformed *Pseudomonas aeruginosa* on a lower density carbodiimide-modified IG-25 surface E ( $\rho_p=5.2 \times 10^{13}$  molecules/cm<sup>2</sup>). (c) Plot of the total number of bacteria (green) and among them the number of PI-positive bacteria (red) on the field of view ( $149 \times 112 \mu\text{m}^2$ ), which were adsorbed on the surface E where lower density of IG-25 was attached via carbodiimide chemistry. The unmodified fluoruous slide serves as a control.

### ***References***

- [1] Santos, C. M.; Kumar, A.; Zhang, W.; Cai, C. *Chem. Commun.* **2009**, 20, 2854-2856.
- [2] Sofia, S. J.; Premnath, V.; Merrill, E. W. *Macromolecules* **1998**, 31, 5059-5070
- [3] Zhu, X. Y.; Jun, Y.; Staarup, D. R.; Major, R. C.; Danielson, S.; Boiadjiev, V.; Gladfelter, W. L.; Bunker, B. C.; Guo, A. *Langmuir* **2001**, 17, 7798-7803.
- [4] Wallart, X.; de Villeneuve, C. H.; Allongue, P. *J. Am. Chem. Soc.* **2005**, 127, 7871-7878.
